# Supplementary material for: A Median Analysis of Factors Influencing Body Fatness in Urban School-Age Children in Cameroon
Source: J Nutr Metab. 2019 Feb 3;2019:1856069. doi: 10.1155/2019/1856069 (PMC6378010; doi:10.1155/2019/1856069)
Supplement: Supplementary Materials — Parent questionnaire. [file 1856069.f1.pdf]

## PARENT QUESTIONNAIRE

Please complete every line of this questionnaire which will take approximately 15 minutes.

Sample code

### A. Education level

| MOTHER                                                                 | FATHER                                                                 |
|------------------------------------------------------------------------|------------------------------------------------------------------------|
| Indicate the number of years you have spent in education (please tick) | Indicate the number of years you have spent in education (please tick) |
| a) None                                                                | a) None                                                                |
| b) ≤ 6 years                                                           | b) ≤ 6 years                                                           |
| c) 7 to 13 years                                                       | c) 7 to 13 years                                                       |
| d) > 13 years                                                          | d) > 13 years                                                          |

### B. Eating habits

Please tick the appropriate frequency of consumption of the following items by your child.

| ITEM                           |                           | FREQUENCY   |                  |                  |              |
|--------------------------------|---------------------------|-------------|------------------|------------------|--------------|
| Fruit and vegetable            |                           | Never       | Occasionally     | Daily            |              |
|                                |                           |             |                  |                  |              |
| Breakfast                      |                           | Skip/rarely | 1 - 2 times/year | 3 - 4 times/week | daily        |
|                                |                           |             |                  |                  |              |
| Snack foods (in-between meals) |                           | Once a day  | Twice a day      | 3 times/day      | >3 times/day |
|                                | Biscuits                  |             |                  |                  |              |
|                                | Popcorn                   |             |                  |                  |              |
|                                | Sweets                    |             |                  |                  |              |
|                                | Yoghurt                   |             |                  |                  |              |
|                                | Cakes                     |             |                  |                  |              |
|                                | Sugar sweetened beverages |             |                  |                  |              |
|                                | Crackers                  |             |                  |                  |              |
|                                | Bread                     |             |                  |                  |              |

### C. Motorization to school

Do you drop your child in school using any of the following means: private cars, taxis, motorbikes, or school bus? (please tick): a) Yes b) No

### D. Out of school physical activity and sedentary lifestyle

|                                                                                                        |                                                    |                                                               |          |                                     |  |
|--------------------------------------------------------------------------------------------------------|----------------------------------------------------|---------------------------------------------------------------|----------|-------------------------------------|--|
| Did your CHILD do the following activities in the <b>past 7 days?</b> (please circle the right answer) |                                                    | <b>MONDAY - FRIDAY</b>                                        |          | <b>SATURDAY - SUNDAY</b>            |  |
|                                                                                                        |                                                    | How many times?<br><b>Mon – Fri</b>                           |          | How many Times?<br><b>Sat – Sun</b> |  |
| EXAMPLE: Bike riding                                                                                   |                                                    | Yes <input checked="" type="radio"/> No <input type="radio"/> | <b>2</b> | <b>1</b>                            |  |
| <b>Physical activity</b>                                                                               |                                                    |                                                               |          |                                     |  |
| Football                                                                                               | Yes <input type="radio"/> No <input type="radio"/> |                                                               |          |                                     |  |
| Handball                                                                                               | Yes <input type="radio"/> No <input type="radio"/> |                                                               |          |                                     |  |
| Jogging                                                                                                | Yes <input type="radio"/> No <input type="radio"/> |                                                               |          |                                     |  |
| Hopscotch                                                                                              | Yes <input type="radio"/> No <input type="radio"/> |                                                               |          |                                     |  |
| Household chores                                                                                       | Yes <input type="radio"/> No <input type="radio"/> |                                                               |          |                                     |  |
| Skipping rope                                                                                          | Yes <input type="radio"/> No <input type="radio"/> |                                                               |          |                                     |  |
| Dancing                                                                                                | Yes <input type="radio"/> No <input type="radio"/> |                                                               |          |                                     |  |
| Farm work                                                                                              | Yes <input type="radio"/> No <input type="radio"/> |                                                               |          |                                     |  |
| Walking to school                                                                                      | Yes <input type="radio"/> No <input type="radio"/> |                                                               |          |                                     |  |
| Cycling                                                                                                | Yes <input type="radio"/> No <input type="radio"/> |                                                               |          |                                     |  |
| Hide and seek                                                                                          | Yes <input type="radio"/> No <input type="radio"/> |                                                               |          |                                     |  |
| Playing on the playground                                                                              | Yes <input type="radio"/> No <input type="radio"/> |                                                               |          |                                     |  |
| Did your CHILD do the following activities in the <b>past 7 days?</b> (please circle the right answer) |                                                    | <b>MONDAY - FRIDAY</b>                                        |          | <b>SATURDAY – SUNDAY</b>            |  |
|                                                                                                        |                                                    | How many hours?                                               |          | How many hours?                     |  |
| <b>Sedentary lifestyle</b>                                                                             |                                                    |                                                               |          |                                     |  |
| Playing video games                                                                                    | Yes <input type="radio"/> No <input type="radio"/> |                                                               |          |                                     |  |
| Watching TV                                                                                            | Yes <input type="radio"/> No <input type="radio"/> |                                                               |          |                                     |  |
| Using the computer                                                                                     | Yes <input type="radio"/> No <input type="radio"/> |                                                               |          |                                     |  |

Adapted from the UK children's physical activity questionnaire (C-PAQ). Medical Research Council (MRC), Epidemiology Unite, 2011.
